# Supplementary material for: Information Extraction from the Text Data on Traditional Chinese Medicine: A Review on Tasks, Challenges, and Methods from 2010 to 2021
Source: Hindawi journal article supplement (doi:10.1155/2022/1679589), 2022-05-13
Supplement: f1 [file 1679589.f1.zip]

| Order number | Author               | Title                                                                                                                                          | Publication year | Dataset size | Data type            | Data number and source of TCM                                                                                                                                  | Disease       | System                    | Methods description (system/model/soft)                                                                                        | Method type                         | Supervised type      | Core content of extracted TCM information                                                                                                                                                                                                 | NLP tasks related to information extraction | Evaluation and Best Performance                                                                                                                          | Comparative Evaluation | Competitive Evaluation                                                                                                                   | Objective                                                                                                                                                                                                                             | Relevant outcomes                                                                                                                                                                                                                                                                                                                                                                                                                                                                  | Challenges                                                                                                                                                                                                                                                                                                                                                                                                                                                       |
|--------------|----------------------|------------------------------------------------------------------------------------------------------------------------------------------------|------------------|--------------|----------------------|----------------------------------------------------------------------------------------------------------------------------------------------------------------|---------------|---------------------------|--------------------------------------------------------------------------------------------------------------------------------|-------------------------------------|----------------------|-------------------------------------------------------------------------------------------------------------------------------------------------------------------------------------------------------------------------------------------|---------------------------------------------|----------------------------------------------------------------------------------------------------------------------------------------------------------|------------------------|------------------------------------------------------------------------------------------------------------------------------------------|---------------------------------------------------------------------------------------------------------------------------------------------------------------------------------------------------------------------------------------|------------------------------------------------------------------------------------------------------------------------------------------------------------------------------------------------------------------------------------------------------------------------------------------------------------------------------------------------------------------------------------------------------------------------------------------------------------------------------------|------------------------------------------------------------------------------------------------------------------------------------------------------------------------------------------------------------------------------------------------------------------------------------------------------------------------------------------------------------------------------------------------------------------------------------------------------------------|
| 4            | Cao et al. 2014      | A semi-supervised learning method for mining of traditional Chinese prescriptions and drugs                                                    | 2014             | CA           | Ancient literature   | 518 medical records from "Classified Medical Records of Contemporary Prescriptions" and "Classified Medical Records of Contemporary Physicians' Prescriptions" | Not specified | None                      | Bootstrapping Approach to Recognize Names of Traditional Chinese Prescriptions and Drugs using Semantic Knowledge              | Machine learning                    | Semi-supervised      | Prescriptions, drugs                                                                                                                                                                                                                      | Entity extraction                           | F-Value of prescription and drug are 74.9% and 90.8% respectively                                                                                        | ✓                      | Compared with human-computer interactions during recognition process                                                                     | Recognition names of Traditional Chinese prescriptions and drugs in an annotated ancient medical features                                                                                                                             | In this paper, a method named Bootstrap, which uses simple context features instead of lexical and syntactic knowledge, was proposed. In the method, iteration process was simplified and regularities in regularity through by pre-processing of context were avoided. Furthermore, human-computer interaction is added to Bootstrap for generating a new framework, which while the semantic, DRG was improved                                                                   | Due to the diversity of ancient medical literatures, low coverage rate of current semantic lexicons and the ambiguity of the lexicon words, low recall rate and low accuracy are realized by using only lexicons to recognize TCM terms.                                                                                                                                                                                                                         |
| 10           | Wang Y. et al. 2014  | Segmented methods for symptoms name recognition in free-text clinical records of traditional Chinese medicine                                  | 2014             | JA           | Clinical records     | 11632 TCM clinical record collected by TCM doctors during their routine diagnostic work from April 2006 to June 2008                                           | Not specified | None                      | MMH / MEMM / CRF                                                                                                               | Machine learning                    | Supervised           | Symptom                                                                                                                                                                                                                                   | Entity extraction                           | The best F-measure achieved by CRF reaches 95.28 (Precision: 94.77% and Recall: 95.49%)                                                                  | ✓                      | Comparison among MMH, MEMM, CRF                                                                                                          | Detect symptom name from free-text clinical record in machine learning methods                                                                                                                                                        | The domain-specific adaptation of sequence labeling requires a appropriate and effective, and the CRF outperforms MMH and MEMM for the CRF task                                                                                                                                                                                                                                                                                                                                    | The methods that are verified on the well-measured data cannot be directly applied to knowledge discovery in the free-text clinical records. In this study, the authors proposed a method for TCM clinical records in time-consuming, and labor-intensive. Hence there is an urgent need for the development of an effective method to automatically detect clinical records                                                                                     |
| 12           | Jiang Q. et al. 2014 | Free-text mining of TCM medical records                                                                                                        | 2014             | CA           | Clinical records     | more than 600 free-text of TCM medical records                                                                                                                 | Not specified | None                      | CRF / MMH / MEMM                                                                                                               | Machine learning                    | Supervised           | Symptoms, signs, TCM diagnosis, Chinese medicines (drug) prescriptions, TCM syndrome type, etc.                                                                                                                                           | Entity extraction                           | CRF: Precision=90.57%, Recall=85.05%, F-score=88.10%; MMH=84.29%, Recall=79.92%, F-score=82.86%                                                          | ✓                      | Comparisons among CRF, MMH and MEMM                                                                                                      | Aim to give an extracted method with text mining based on conditional random fields                                                                                                                                                   | CRF is more appropriate and precise than MMH, MEMM and MEMM for clinical terms recognition in TCM medical records                                                                                                                                                                                                                                                                                                                                                                  | How to extract medical terms from TCM medical records based on conditional random fields.                                                                                                                                                                                                                                                                                                                                                                        |
| 13           | Jiang Q. et al. 2014 | Multi-combined features text mining of TCM clinical cases                                                                                      | 2014             | CA           | Clinical records     | about 600 TCM medical cases obtained from traditional Chinese medicine journal of Hospital of Guangdong Province                                               | Not specified | None                      | CRF                                                                                                                            | Machine learning                    | Supervised           | Symptoms or signs, TCM diagnosis, TCM syndrome type, Chinese medicines (drug), and names of TCM prescriptions                                                                                                                             | Entity extraction                           | With all features: P=89.14%, R=82.91%, F=86.39%                                                                                                          | ✓                      | Compared with different combined labeling features                                                                                       | In order to improve accuracy of recognitions, CRF model is used for terms recognition in TCM medical cases with multi-labeling features                                                                                               | How to extract the data and terms automatic, intelligently, and clearly into a database                                                                                                                                                                                                                                                                                                                                                                                            |                                                                                                                                                                                                                                                                                                                                                                                                                                                                  |
| 14           | Wang J. et al. 2014  | Relation extraction from Traditional Chinese Medicine journal publications                                                                     | 2014             | CA           | Journal publications | 31 pieces of TCM journal publication                                                                                                                           | Not specified | None                      | Decision Tree / rules                                                                                                          | Machine learning, rule-based method | Supervised           | Effect relation, conditional effect relation                                                                                                                                                                                              | Relation extraction                         | Rule-based approach: F-score=48%, feature-based approach: F-score=41%                                                                                    | ✓                      | Comparison between the rule-based method and the feature-based approach                                                                  | Extract relations from traditional Chinese medicine journal publications                                                                                                                                                              | The rule-based approach avoids the rule-based approach which may be due to the small size of the dataset and the feature-based approach which may be due to the small size of the dataset. The feature-based approach and compare the relation extraction and classification tasks with the more Chinese-specific NLP problems, such as word segmentation, word co-occurrence analysis, etc.                                                                                       | How to extract the data and terms automatic, intelligently, and clearly into a database                                                                                                                                                                                                                                                                                                                                                                          |
| 15           | Wan H. et al. 2014   | Extracting relations from traditional Chinese medicine journal publications                                                                    | 2014             | JA           | Journal publications | 301610 abstracts in published articles on TCM from a Chinese publication database                                                                              | Not specified | None                      | Heterogeneous factor graph model (HFGM)                                                                                        | Machine learning                    | Semi-supervised      | Herb-symptoms relation, herb-disease relation, formula-symptoms relation, formula-disease relation, syndrome-symptoms relation                                                                                                            | Relation extraction                         | Precision=90.39%, Recall=86.09%, F1=88.58%                                                                                                               | ✓                      | Comparison with a traditional TSM classifier                                                                                             | Collectively and globally extract multiple types of relations from the entire corpus of Chinese medicine journal publications                                                                                                         | The challenge of relation extraction from TCM data is the complexity of the TCM system. Multiple types of relations exist in TCM data, such as herb-symptoms, herb-disease, formula-symptoms, formula-disease, syndrome-symptoms, syndrome-disease, etc.                                                                                                                                                                                                                           | How to extract the data and terms automatic, intelligently, and clearly into a database                                                                                                                                                                                                                                                                                                                                                                          |
| 16           | Liang J. et al. 2017 | A Novel Approach towards Medical Entity Recognition in Chinese                                                                                 | 2017             | JA           | Clinical records     | 872 extraction records from Second Affiliated Hospital Zhejiang University School of Medicine                                                                  | Not specified | None                      | CRF                                                                                                                            | Machine learning                    | Supervised           | TCM drug name                                                                                                                                                                                                                             | Entity extraction                           | Recognition of traditional Chinese medicine drug names: precision=94.2%, recall=92.81%, F-measure=93.5%                                                  | ✓                      | Compared with the baseline system which used the maximum matching algorithm and professional drug dictionaries (dictionary-based method) | Proposed a new cascaded-type approach towards medical entity recognition in Chinese                                                                                                                                                   | The proposed approach avoids the side effect of the baseline system which used the maximum matching algorithm and professional drug dictionaries (dictionary-based method) and improves the recognition performance of drug named entities in the linguistic (Chinese) domain                                                                                                                                                                                                      | Much less work has been done on medical entity recognition than that written in Chinese, or in the setting of differentiation of Chinese drug names between traditional Chinese medicine and Western medicine                                                                                                                                                                                                                                                    |
| 19           | Zhang H. et al. 2019 | TCMR: A TCM Entity Recognition Framework                                                                                                       | 2019             | CA           | Web data             | 7500 TCM related entity data from BaiduBaidu and HupuBaidu                                                                                                     | Not specified | TCM entity filter (TCMEF) | Short Text TCM Classifier (STTC)                                                                                               | Deep learning                       | Supervised           | Patient name                                                                                                                                                                                                                              | Entity extraction                           | F1 score of TCMER=92.75%                                                                                                                                 | ✓                      | Compared with general word-based short text classification algorithms and Latent Dirichlet Allocation based model                        | Propose a three-phase filtering framework for TCM entities                                                                                                                                                                            | The three-phase filtering framework for TCM entities uses the stroke features of the Chinese characters in the TCM text to filter the noise and improve the recognition performance of TCM entities. The proposed approach avoids the side effect of the baseline system which used the maximum matching algorithm and professional drug dictionaries (dictionary-based method) and improves the recognition performance of drug named entities in the linguistic (Chinese) domain | The entities in text style and character shape in TCM files are often shorter than 20, many of them are even shorter than 10 characters. It is hard for general short text classification algorithms to detect enough features for these files                                                                                                                                                                                                                   |
| 21           | Chen Y. et al. 2018  | Knowledge Management in Traditional Chinese Medicine                                                                                           | 2018             | JA           | Web data             | China Food Composition and three Chinese food composition and three Chinese food composition                                                                   | Not specified | None                      | CRF for the entity extraction, SVM, naive Bayes (NB), LSTM, and KNN for relation extraction                                    | Machine learning, deep learning     | Supervised           | Entities: food material, dish, nutritional element, symptom, and crowd relation; "good for" or "bad for" relationship between "food material" and "symptom"; and "same" or "different" relationships between two "food material" entities | Entity extraction, relation extraction      | concept extraction and relationship recognition were all above 80%                                                                                       | ✓                      | Compared among SVM, NB, LSTM, KNN                                                                                                        | To help people retrieve and learn healthy diet knowledge more efficiently and comprehensively, the paper designs a knowledge graph to integrate healthy diet information in the literature and provides a semantic retrieval system   | The data regarding healthy diet available in the Internet is increasing rapidly and is distributed on multiple sources. It is time-consuming for users to learn about healthy diet on the Internet. They need to search data on multiple platforms, choose and integrate information, and then understand what they have learned                                                                                                                                                   |                                                                                                                                                                                                                                                                                                                                                                                                                                                                  |
| 22           | Chen Y. et al. 2019  | A general approach for recognizing deep learning-based medical entity recognition in traditional Chinese medicine                              | 2019             | JA           | Journal publications | 10810 abstracts from papers published in 114 traditional Chinese medicine journals                                                                             | Not specified | None                      | Combine BERT with a one-dimensional convolutional neural network (LSTM) to extract the entity information from the pre-trained | Deep learning                       | Supervised           | Herb-symptoms relation, herb-disease relation, formula-symptoms relation, formula-disease relation, syndrome-symptoms relation                                                                                                            | Relation extraction                         | The 15-CHN fine-tuning approach: Precision=95.18%, Recall=90.41%, F1-measure=92.82%                                                                      | ✓                      | Compared with SVM, iterative SVM, HFGM, L1-CHN general embeddings, L1-CHN TCM embeddings, BERT with pre-trained model                    | Propose a pre-trained model and a fine-tuning technique to improve three approaches related to entity relation: consuming human labeling                                                                                              | The 15-CHN fine-tuning approach achieves the best performance on four of the nine relation types                                                                                                                                                                                                                                                                                                                                                                                   | Most of the current deep learning approaches for medical relation extraction require large-scale training data to pre-train embeddings of the words                                                                                                                                                                                                                                                                                                              |
| 23           | Gong F. et al. 2019  | On building a diabetes knowledge base for mining the health data                                                                               | 2019             | JA           | Web data             | 7700 researches and 90041 cases from eight prevalent chronic diseases on health care in 2019                                                                   | Diabetes      | None                      | Insurance matching algorithm                                                                                                   | Dictionary-based method             | Supervised           | Traditional Chinese medicine                                                                                                                                                                                                              | Entity extraction                           | The accuracy of overall knowledge base is 98.1%                                                                                                          | ✓                      | Compared with insurance matching with pre-processing                                                                                     | Constructing a high-quality knowledge base of a specific disease to support the disease detection tasks (like EHR-based detection)                                                                                                    | Introduced an approach to constructing diabetes knowledge base                                                                                                                                                                                                                                                                                                                                                                                                                     | To support the medical professionals' diagnosis and analysis against a mass of labor cost to collect experimental data, which is also very poor. To reduce the cost and to ensure the data quality, there is a growing need of automatic relation extraction from large-scale health data                                                                                                                                                                        |
| 24           | Jin L. et al. 2019   | Named Entity Recognition in Traditional Chinese Medicine                                                                                       | 2019             | CA           | Text book            | 75 modern TCM clinical cases and 14 ancient TCM clinical cases from two authoritative clinical case books and literatures in QCMET                             | Not specified | None                      | TCMRG-LSTM-CRF                                                                                                                 | Deep learning                       | Supervised           | Medicine, dose, prescription, process, disease, symptom, syndrome, meridian, property/flavor and function                                                                                                                                 | Entity extraction                           | F1 score=89.41%                                                                                                                                          | ✓                      | Compared with CRF, BiLSTM-CRF, BiLSTM-CRF Pretrained                                                                                     | These methods cannot effectively solve the problem of low recognition rate of new words, which is common in TCM field                                                                                                                 | Propose TCMRG-LSTM-CRF model that offers knowledge integration to strength the learning ability and recognize new words. The model integrates knowledge integration and knowledge graph construction and considers relations from context word. The experiment results show that the proposed model can effectively solve the problem of low recognition rate of new words, which is common in TCM field                                                                           | How to effectively solve the problem of low recognition rate of new words, which is common in TCM field                                                                                                                                                                                                                                                                                                                                                          |
| 26           | Song B. et al. 2020  | Incorporating Lexicon for Named Entity Recognition of Traditional Chinese Medicine Books                                                       | 2020             | CA           | Ancient literature   | 376 TCM books from the Han Dynasty to the Qing Dynasty                                                                                                         | Not specified | None                      | BiLSTM-CRF                                                                                                                     | Deep learning                       | Supervised           | Symptom                                                                                                                                                                                                                                   | Entity extraction                           | Precision=76.80%, Recall=72.11%, F1=74.28%                                                                                                               | ✓                      | Compared with MMH, CRF                                                                                                                   | In order to improve the performance of NER for TCM books                                                                                                                                                                              | Lexicon information and large-scale of unlabeled corpus data are not fully exploited in the previous methods                                                                                                                                                                                                                                                                                                                                                                       |                                                                                                                                                                                                                                                                                                                                                                                                                                                                  |
| 29           | Feng J. et al. 2020  | Research on Named Entity Recognition of Traditional Chinese Medicine                                                                           | 2020             | CA           | Clinical records     | 131 electronic medical records from the Hubei Provincial Hospital of Traditional Chinese Medicine                                                              | Not specified | None                      | BiLSTM-CRF, BiLSTM-CRF, BiLSTM-CRF                                                                                             | Deep learning                       | Supervised           | Symptom                                                                                                                                                                                                                                   | Entity extraction                           | The BERT model: Precision=89.94%, Recall=82.74%, F1=86.10%                                                                                               | ✓                      | Compared with BiLSTM-CRF and BiLSTM-CRF                                                                                                  | In order to explore the effective method of named entity recognition of TCM ER                                                                                                                                                        | The BERT model: Precision=89.94%, Recall=82.74%, F1=86.10%                                                                                                                                                                                                                                                                                                                                                                                                                         | (1) The naming entity of traditional Chinese medicine has complex characteristics and uncertain length. In addition, there are sub-entities in the entity. Therefore, the task of named entity recognition in traditional Chinese medicine is more complex and more difficult than that in general fields. (2) Character-based model can avoid word segmentation errors, but it can also lose the word information contained in the word sequence in the process |
| 31           | Lu L. et al. 2020    | A semi-supervised approach for extracting TCM clinical terms from free-text records                                                            | 2020             | JA           | Text book            | Formulae of Chinese Medicine (2000 words)                                                                                                                      | Not specified | None                      | BiLSTM-CRF                                                                                                                     | Deep learning                       | Semi-supervised      | Traditional Chinese medicine, symptoms, patterns, diseases and formulae                                                                                                                                                                   | Entity extraction                           | F1 value=78.78%, Precision=77.58%, Recall=78.7%                                                                                                          | ✓                      | Compared with the supervised method                                                                                                      | Propose a semi-supervised approach for extracting TCM clinical terms based on character vector                                                                                                                                        | The method reduces the cost of manual labeling and improves the experiment results on the help of the free-text work                                                                                                                                                                                                                                                                                                                                                               | (1) Ancient Chinese language is inherently used in the TCM corpus which brings difficulties to TCM NER research. (2) Manual labeling of supervised methods are costly and labor-intensive                                                                                                                                                                                                                                                                        |
| 32           | Zhang M. et al. 2020 | Traditional Chinese Medicine Knowledge Service based on Semi-Supervised BERT-BiLSTM-CRF Model                                                  | 2020             | CA           | Ancient literature   | A total of 32614 characters from "Treatise on Febrile Diseases"                                                                                                | Not specified | None                      | BERT-BiLSTM-CRF                                                                                                                | Deep learning                       | Semi-supervised      | Symptoms, syndromes, treatment, Chinese medicine, prescriptions, pulse, tongue, efficacy                                                                                                                                                  | Entity extraction                           | Accuracy=81.24%, Recall=80.94%, F1 value=81.04%                                                                                                          | ✓                      | Compared with CRF, BiLSTM-CRF                                                                                                            | This paper proposes a semi-supervised method to extract entities from TCM texts                                                                                                                                                       | The experiment shows that TCM entity recognition accuracy of the embedded Semi-BERT-BiLSTM-CRF model reaches 81.24%, which effectively improves the TCM entity recognition accuracy and reduces the manual labeling work. The results of this research can be applied to scenarios such as auxiliary diagnosis of TCM and expert system after subsequent improvement and refinement                                                                                                | The existing methods are not accurate enough to solve TCM named entity recognition and require a lot of manual labeling data                                                                                                                                                                                                                                                                                                                                     |
| 34           | Qin C. et al. 2020   | Named Entity Recognition of TCM Text Based on BiLSTM Model                                                                                     | 2020             | CA           | Ancient literature   | A total of 32614 characters from "Treatise on Febrile Diseases"                                                                                                | Not specified | None                      | BERT-BiLSTM-CRF                                                                                                                | Deep learning                       | Supervised           | Symptoms, disease, names, text, prescription names, and drug names                                                                                                                                                                        | Entity extraction                           | The best recognition effect of drug, with an F-value as high as 88.79%                                                                                   | ✓                      | Compared with BiLSTM-CRF, LSTM-CRF                                                                                                       | Aiming at the problem of fuzzy entity recognition and less labeled data in the field of traditional Chinese medicine, a named entity recognition model based on BiLSTM-CRF is constructed and tested on the cross-validation data set | By constructing the word vector through the fast model and then using it as a BiLSTM-CRF, both the accuracy rate, the recall rate, and the F1 value are improved                                                                                                                                                                                                                                                                                                                   | The problem of fuzzy entity recognition and less labeled data in the field of TCM                                                                                                                                                                                                                                                                                                                                                                                |
| 35           | Wan H. et al. 2020   | A temporal semantic network system for traditional Chinese medicine based on temporal knowledge graphs                                         | 2020             | CA           | Clinical records     | More than 100,000 cases abstracts from a Chinese publication database                                                                                          | Not specified | None                      | Multi-view graph model to extract relation (MVGR)                                                                              | Deep learning                       | Supervised           | Herb-symptoms relation, herb-disease relation, formula-symptoms relation, formula-disease relation, syndrome-symptoms relation                                                                                                            | Relation extraction                         | Precision=80.38%, Recall=81.42%, F1 score=84.07%                                                                                                         | ✓                      | Compared with SVM-C, PTM, Adabo, BiLSTM                                                                                                  | Extract relations from Chinese clinical records                                                                                                                                                                                       | Very limited related information system has been constructed on clinical records written in Chinese, especially TCM clinical records                                                                                                                                                                                                                                                                                                                                               |                                                                                                                                                                                                                                                                                                                                                                                                                                                                  |
| 37           | Tang C. et al. 2020  | Implementing a temporal semantic network system for traditional Chinese medicine based on temporal knowledge graphs                            | 2020             | CA           | Clinical records     | Classic Chinese Medicine Clinical Case Library                                                                                                                 | Not specified | None                      | Temporal facts                                                                                                                 | Rule-based method                   | Supervised           | Temporal facts                                                                                                                                                                                                                            | Relation extraction                         | Average Precision=0.825                                                                                                                                  | ✓                      | Compared with off-the-shelf entity linking                                                                                               | Implement a temporal semantic network system                                                                                                                                                                                          | Propose a new model labeled for TCM based on the temporal knowledge graph in this paper                                                                                                                                                                                                                                                                                                                                                                                            | Current TCM-based retrieval systems cannot effectively deal with the temporal relations of search sentences, which leads to bad experiences for users in retrieval scenarios. Most of temporal information are ignored in the knowledge map construction                                                                                                                                                                                                         |
| 39           | Zhang D. et al. 2020 | Named Entity Recognition for Traditional Chinese Medicine Text using a Novel Back-Labeling Approach                                            | 2020             | JA           | Ancient literature   | Chinese medical records of all famous records (10000 words)                                                                                                    | Not specified | None                      | BiLSTM                                                                                                                         | Deep learning                       | Distantly supervised | Chinese medicine, symptom, medicine prescription, dose, tongue, pulse, pulse                                                                                                                                                              | Entity extraction                           | Precision=73.06%, Recall=68.79%, F1-measure=69.76%                                                                                                       | ✓                      | Compared with BiLSTM-CRF and dictionary matching method                                                                                  | Propose a method for entity recognition based on distant supervision, and complete the entity recognition task under the premise of only using the entity vocabulary related to the TCM field                                         | The scheme can effectively improve the entity recognition on the basis of distant supervision                                                                                                                                                                                                                                                                                                                                                                                      | The limitation of using machine learning methods, which is need of a large amount of manually labeled data                                                                                                                                                                                                                                                                                                                                                       |
| 43           | Zhou S. et al. 2021  | Feature engineering in deep learning for traditional Chinese medicine identification: Toward applications using a Novel Back-Labeling Approach | 2021             | JA           | Journal publications | 317 papers with 25007 sentences from human-curated Chinese literature resources derived from CNKI                                                              | Asthma        | None                      | Structural Redefinition Long Short-Term Memory (SLSTM)                                                                         | Deep learning                       | Supervised           | Subjects, methods, results                                                                                                                                                                                                                | Section extraction                          | SLSTM model achieve close to 90% performance in precision, recall, and F1-measures                                                                       | ✓                      | Compared with CRF, BiLSTM, HMM, LSTM                                                                                                     | Studied the paper section identification problem in the context of Chinese medical literature analysis, where the subjects, methods, and results are more valuable from a physician's perspective                                     | Design a novel deep learning model, the Structural Redefinition BiLSTM model, which outperforms the traditional machine learning methods and other deep learning methods                                                                                                                                                                                                                                                                                                           | Due to natural language differences, the extracted features from English texts cannot be directly applied onto Chinese medical literature. Moreover, Chinese medical literature is often less structured than English literature, which makes the problem more difficult to tackle                                                                                                                                                                               |
| 44           | Bai T. et al. 2021   | Traditional Chinese medicine entity relation extraction based on CNN with segment attention                                                    | 2021             | JA           | Web data             | Annotated dataset with 4322 samples of herb-disease and 4666 samples of herbs chemicals combination extracted from PubMed                                      | Not specified | None                      | SEGAT-CNN combined with segment attention                                                                                      | Deep learning                       | Supervised           | Herb-disease relation, herb-disease relation, herb-disease relation                                                                                                                                                                       | Entity extraction, relation extraction      | Herb-disease relation: SVM combined SEGAT-CNN: P=93.43%, R=93.52%, F1=93.43; Herb-disease relation: SVM combined SEGAT-CNN: P=93.43%, R=93.52%, F1=93.43 | ✓                      | Compared with SVM, KNN, LR, RF                                                                                                           | In order to extract Chinese medicine-specific entity relations more reliably and effectively from TCM literature                                                                                                                      | Propose a novel architecture with an improved layer for entity relation extraction. The method has an absolute advantage and is proved to be effective in solving the problem of herbal related relation extraction                                                                                                                                                                                                                                                                | (1) Although the deep learning technology has been applied to the relation extraction task with superlatives, recent works are often adapted to TCM text. (2) Language gap exists between TCM text from researches. (3) Classical machine learning algorithms improve the accuracy of relation extraction primarily through complicated manual feature engineering, which constrains the potential of accuracy improvement for classical machine learning        |
| 45           | Ha D. et al. 2021    | Named Entity Recognition of Traditional Chinese Medicine Patterns Based on BiLSTM-CRF                                                          | 2021             | JA           | Patient tests        | A total of 2000 TCM patients' abstract texts from intellectual property websites                                                                               | Not specified | None                      | BiLSTM-CRF                                                                                                                     | Deep learning                       | Supervised           | Herb name, disease name, symptom, therapeutic effect, property                                                                                                                                                                            | Entity extraction                           | precision rate is 94.33%, recall rate is 94.47%, and F1 value is 94.48%                                                                                  | ✓                      | Compared with HMM, LSTM, BiLSTM                                                                                                          | The study aims to design a model to fill the technical gap in NER of TCM patients                                                                                                                                                     | A method combining Bidirectional Long Short-Term Memory neural network with Conditional Random Field (BiLSTM-CRF) is proposed to automatically recognize entities of herbs, herb names, disease names, symptoms, and therapeutic effects from the abstract texts of TCM patients' abstract texts. The experimental results show that the proposed model can effectively solve the problem of low recognition rate of new words, which is common in TCM field                       | (1) Due to the long history and wide geographical distribution of herbs. (2) Due to the different writing habits, TCM doctors and researchers tend to express a similar disease name in language similar with classical Chinese. (3) Due to the lack of labeled training data, TCM patients' tests, a proper training set has to be established from only unlabeled data                                                                                         |
| 46           | Jin C. et al. 2021   | Detection of Traditional Chinese Medicine Entity Recognition Based on BiLSTM-CRF                                                               | 2021             | JA           | Clinical records     | Case book of TCM compiled by the expert team of Professor Lu Zhaolin                                                                                           | Not specified | None                      | Span-level distant supervised named entity recognition (NER)                                                                   | Deep learning                       | Distantly supervised | Symptom, medicine, prescriptions, dose, tongue, pulse, pulse                                                                                                                                                                              | Entity extraction                           | Precision=78.78%, Recall=75.52, F1 score=77.24                                                                                                           | ✓                      | Compared with distant-LSTM-CRF, BiLSTM-CRF, BiLSTM-CRF                                                                                   | The idea is to utilize distant supervised method to conduct the named entity recognition (NER) task                                                                                                                                   | Propose a span-level distant supervised named entity recognition (NER) approach to extract TCM-related entity. It utilizes the pre-trained language model, a simple multi-layer neural network, and a span-level distant supervised method to extract the named entity from the span-level model. The strategy randomly extracts negative samples in every epoch and then the possible loss negative sample proportion. It can be used to reduce the loss of the model             | (1) Most of TCM clinical records are unstructured text. (2) The names in free-style and difficult to understand for modern medical practitioners. (3) The model of manually structuring and maintaining free-text clinical records is very expensive. (4) Lack of gold standard datasets for supervised learning methods                                                                                                                                         |
| 47           | Zheng T. et al. 2021 | Chinese medical entity relation extraction based on multi-head self-attention mechanism                                                        | 2021             | JA           | Journal publications | 4000 Chinese medical literature abstracts                                                                                                                      | Not specified | None                      | Multi-head self-attention mechanism-BiLSTM                                                                                     | Deep learning                       | Supervised           | Therapeutic relation, causal relation                                                                                                                                                                                                     | Relation extraction                         | Therapeutic relation: Precision=88.65, Recall=88.22, F1 score=89.19; Causal relation: Precision=89.23, Recall=79.53, F1 score=84.47                      | ✓                      | Compared with CNN, Bi-LSTM, Bi-LSTM+Self-attention, Bi-LSTM+Multi-head attention                                                         | Propose an attention-based model to extract the multi-aspect semantic information for the Chinese medical entity relation by multi-head self-attention mechanism                                                                      | The model could generate multiple weight vectors for the sentence through each attention layer. Therefore, we can generate the different semantic representation of a sentence, respectively. Experimental results show that the proposed model can effectively solve the problem of low recognition rate of new words, which is common in TCM field                                                                                                                               | (1) Complex semantic information in the sentence determines the relation between entities, the semantic information cannot be represented by one sentence vector. (2) Machine learning methods rely on manual selection of features, which is laborious and time-consuming                                                                                                                                                                                       |
| 48           | Xu H. et al. 2021    | A Named Entity Recognition Model for Traditional Chinese Medicine                                                                              | 2021             | CA           | Clinical records     | 4000 sentences from 4000 Chinese medical records                                                                                                               | Not specified | None                      | Named NER model based on LSTM-CRF                                                                                              | Deep learning                       | Supervised           | Medicine, symptom, pulse, tongue, medicine prescription, dose, disease location, onset time and duration, severity, color, quantity, frequency                                                                                            | Entity extraction                           | Precision=85.64, Recall=86.11, F1 score=85.81                                                                                                            | ✓                      | Compared with LSTM-CRF, Attention hypergraph, Span-based model                                                                           | Propose a named entity recognition method for traditional Chinese medicine records                                                                                                                                                    | This paper can word character-level embeddings to enable the model to better learn semantic and syntactic information. Two-layer labeling strategy allows the model to better extract hierarchical information. This work provides a good named NER method for TCM records, which can be used to extract the named entity from TCM records                                                                                                                                         | Entity boundary problems caused by the difference between words and characters in TCM corpus, many methods that have good performance on the English datasets are not suitable for the NER task in TCM field                                                                                                                                                                                                                                                     |
| 49           | Guan Y. et al. 2021  | A Traditional Chinese Medicine Terminology Recognition Model Based on Ontology Learning                                                        | 2021             | CA           | Ancient literature   | TCM prescription in 517 ancient TCM books                                                                                                                      | Not specified | None                      | BERT-BiLSTM-CRF                                                                                                                | Deep learning                       | Supervised           | Disease, pattern, symptom                                                                                                                                                                                                                 | Entity extraction                           | Precision=86.54, Recall=88.58, F1 score=87.55, when the size of training set is 10000                                                                    | ✓                      | Compared with BiLSTM, BiLSTM+CRF, BiLSTM+CRF                                                                                             | Presented a traditional Chinese medicine terminology recognition model named BERT-BiLSTM-CRF                                                                                                                                          | Transferring a BERT model trained on other large-scale Chinese corpus as the pre-training model benefits the TCM terminology recognition, and CRF plays an important role in modeling the contextual semantic features of sequences in TCM term recognition                                                                                                                                                                                                                        | (1) There are some characteristics in Chinese text, such as fuzzy word boundary and lack of explicit morphological features of entities, which increase the problem of NER model for Chinese text. (2) How to apply the most advanced deep learning model to the task of TCM term recognition                                                                                                                                                                    |
