# Supplementary material for: Information Extraction from the Text Data on Traditional Chinese Medicine: A Review on Tasks, Challenges, and Methods from 2010 to 2021
Source: Evid Based Complement Alternat Med. 2022 May 13;2022:1679589. doi: 10.1155/2022/1679589 (PMC9122692; doi:10.1155/2022/1679589)
Supplement: Supplementary Materials — Supplementary 1. PRISMA checklist. Supplementary 2. The basic information and extracted data of included papers. [file 1679589.f1.zip]

Archive with 3 entries (3 files):
- Appendix 1_PRISMA_checklist.docx
- Appendix 2.xlsx
- Appendix 2_The basic information and extracted data of each included paper.pdf
