# Supplementary material for: Information Extraction from the Text Data on Traditional Chinese Medicine: A Review on Tasks, Challenges, and Methods from 2010 to 2021
Source: Evid Based Complement Alternat Med. 2022 May 13;2022:1679589. doi: 10.1155/2022/1679589 (PMC9122692; doi:10.1155/2022/1679589)
Supplement: Supplementary Materials — Supplementary 1. PRISMA checklist. Supplementary 2. The basic information and extracted data of included papers. [file 1679589.f1.zip › Appendix 2.xlsx]

## Sheet: Sheet1
Order number	Author	Title	Published year	Document type	Data type	Data number and source of TCM	Disease	System	Methods description (system/model / tool)	Method type	Supervised type	Core content of extracted TCM informations	NLP tasks related to information extraction	Evaluation and Best Performance	Comparative Evaluation	Comparative Evaluation	Objective	Relevant outcomes	Challenges
1	Zhu W et al., 2010	An Information Extraction Method for Digitized Textbooks of Traditional Chinese Medicine	2010	CA	Text book	474 herbal medicine entities and 768 prescription entities from four digitized textbooks	Not specified	None	SVM	Machine learning	Supervised	Attributes of herbal medicine entities and prescriptions, including mdicine application, medicine class, medicine dosage, medicine property, prescription usage, prescription attend illness, prescription function	Attribute extraction	Medicine application: P=99.6%, R=98.3%; medicine class: P=98.1%, R=99.3%; medicine dosage: P=91.4%, R=93.9%; medicine property: P=84.8%, R=89.5%; prescription usage: P=97.9%, R=92.7%; prescription attend illness: P=85.1%, R=88.7%; prescription function: P=83.6%, R=92.5%;	None		Present an ontology-based approach to extracts detailed attributes of Traditional Chinese Medicine (TCM) from digitized textbooks, which combined the ontology and machine learning method to extract the attribute of TCM from digitized textbooks.	This method was a practical and robust exploration to address the problem of information extraction for digitized textbooks of TCM.	Extracting detailed information out of thousands of different materials and provide semantic services is a challenge that tackles the development of digital library. The problem is that the information extracted remains insufficient and can hardly meet the requirement for advanced semantic services. Information like textual annotation seems quite vain when compared with manually inputted data.
2	Zhou C et al., 2011	GRAPH: A Domain Ontology-driven Semantic Graph Auto Extraction System	2011	JA	Journal publications	2000 publications	Not specified	GRAPH (a domain ontology-driven semantic graph auto extraction system)	Not mentioned	Dictionary-based method	/	Domain-specific words	Entity extraction	Not mentioned	None		Discover knowledge from text publications in traditional Chinese medicine.	The algorithm not only can extract relations between words that have already been annotated by relations in the knowledge base but also can predict the relations between words that have never been annotated by relations.	TCM is a special domain in which most publications were written in Chinese, even ancient Chinese, that is extremely difficult for computer systems to understand so far.
3	Zhu W et al., 2011	A TCM diagnosis system based on textbook information extraction	2011	CA	Ancient literature	2 books (Synopsis of Prescriptions of the Golden Chamber,Treatise on Febrile Disease)	Not specified	None	SVM and regular expression	Combine the machine learning and rule-based method	Supervised	Symptom, diagnosis	Entity extraction	Not mentioned	None		Identifying and extracting targeted information from the medical books and provides a more preferable and convenient services for users.	This paper designed a semantic ontology which can achieve targeted and precise extraction by combining it with SVM classification and regular expression match.	Content correlation and semantic identification in textbooks act as a big obstacle in the digitalization research.
4	Cai D et al., 2011	A semi-supervised learning method for names of traditional Chinese prescriptions and drugs recognition	2011	CA	Ancient literature	519 medical records from “Classified Medical Records of Distinguished Physicians” and “Classified Medical Records of Distinguished Physicians Continued”	Not specified	None	Bootstrapping Approach to Recognize Names of Traditional Chinese PrescrIptions and DrUgs using Semantic Knowledge	Machine learning	Semi-supervised	Prescriptions, drugs	Entity extraction	F-Value of prescription and drugs are 74.9% and 90.6% respectively	Ö	Compared with no human-computer interactions during recognition process	Recognize names of Traditional Chinese prescriptions and drugs in un-annotated ancient medical literatures.	In this paper, a method named Barpidusk, which uses simple context features instead of lexical and syntactic knowledge, was proposed. In the method, iteration process was simplified; and ambiguities or mistakes brought by pre-processing of corpus were avoided. Furthermore, human-computer interaction is added to Bootstrapping for generating a new framework, within which the semantic drift was reso…	Due to the diversity of ancient medical literatures, low coverage rate of current semantic lexicons and the ambiguities of the lexicon words, low recall rate and low accuracy are resulted by using only lexicons to recognize TCM terms.
5	Wang Y et al, 2012	A framework and its empirical study of automatic diagnosis of traditional Chinese medicine utilizing raw free-text clinical records	2012	JA	Clinical records	7972 clinical records collected and transcripted from TCM routine diagnostic work	Not specified	None	Maximum match algorithm	Dictionary-based method	/	Symptom	Entity extraction	Recognition rate=97.52%, error rate=7.38%	None		Automatic symptom extraction and diagnosis of traditional Chinese medicine utilizing raw free-text clinical records.	Proposed a novel framework to automatic symptom extraction and diagnosis of TCM utilizing raw free-text clinical records.	(1) How to automatically structure the raw TCM FCRs. (2) How to process and use the other information contained in raw TCM FCRs.
6	Zhu W et al., 2012	Extracting Medical Records with Hierarchical Information Extraction Method	2013	JA	Clinical records	7 TCM books	Not specified	None	Decision Tree and CRF	Machine learning	Supervised	Irrelevant information, basic information, multiclass information, symptom information, prescription information and result information	Unit extraction	Paragragh(unit) identification: precision>84%; information extraction: precition>80%(except for a book)	None		Present a hierarchical information extraction method that extracts medical records in a multi-level way.	This approach achieved a goodperformance for most of the test books and can be applied for other similar tasks.	(1) The content of TCM records is in old Chinese language, which is hard to process with normalnatural language processing techniques. (2) theTCM docunients contain multiple and diverse writtenstyles as they were accomplished by different authors.Hence,it is difficult to adopt general informationextraction approaches on the problems of TCM extraction. Hence, it's difficult to extract these record…
7	Cao C et al, 2014	Extracting terms from clinical records of traditional Chinese medicine	2014	JA	Clinical records	42 health records in TCM literature	Not specified	None	Rules and likelihood ratio	Rule-based method	/	Terms of body structures and clinical description	Terms extraction	Precision=88.18%; recall=94.21%.	None		Extract terms of body structure and clinical description from health records of traditional Chinese medicine.	The iterative method based on seed terms is very effective for TCM term extraction.	TCM medical terms have issues of flexibility and unclear boundaries, making them hard to be extracted accurately.
8	Chen X et al, 2014	BioTCM-SE: A semantic search engine for the information retrieval of modern biology and Traditional Chinese Medicine	2014	JA	Web data	Online databases (5 databases)	Not specified	None	Multiple text-processing techniques such as MapReduce parallel computing framework and Web Service	Dictionary-based method	/	TCM drug, disease, TCM herb, syndrome, symptom	Entity extraction	Not mentioned	None		Present BioTCM-SE, a semantic search engine for the information retrieval of modern biology and TCM.	BioTCM-SE system can provide biologists with a comprehensive, reliable, and accurate associated knowledge query platform for the information retrieval of modern biology and TCM.	Confronted with large-scale, heterogeneous, interlinked, and complex-format biomedical data, it becomes quite difficult to construct a comprehensive and accurate knowledge query platform for associated TCMs and bioentities.
9	Feng L et al., 2014	Development of large-scale TCM corpus using hybrid named entity recognition methods for clinical phenotype detection: An initial study	2014	CA	Clinical records	More than 2000 EMRs	Not specified	ERS	CRF and Bootstrapping	Machine learning	Supervised	Clinical phenotype	Entity extraction	Not mentioned	None		Develop an annotation system for TCM clinical text corpus to reduce the manual labors.	The system have curated more than 2,000 records of chief complaint in an effective way.	Automatically extracting meaningful information and knowledge from TCM EMR data is challenging due to the flexibility of Chinese language and the individualized expressions of TCM clinical records. At the same time, there is lack of large-scale annotation corpus in TCM field.
10	Wang Y et al, 2014	Supervised methods for symptom name recognition in free-text clinical records of traditional Chinese medicine: An empirical study	2014	JA	Clinical records	11613 TCM clinical record collected by TCM doctors during their routine diagnostic work from April 2006 to June 2008	Not specified	None	HMM / MEMM / CRF	Machine learning	Supervised	Symptom	Entity extraction	the best F-measure achieved by CRF reaches 95.12% (Precion= 94.77% and Recall= 95.48%)	Ö	Comparison among HMM, MEMM, CRF	Extract symptom name from free text clinical record in machine learning methods.	The domain-specific adaptation of sequence labeling strategies is appropriate and effective, and that CRF outperforms HMM and MEMM for the SNR task.	The methods that are verified on the well-structured data cannot be directly applied to knowledge discovery in the free-text clinical records of TCM. However, manually structuring the large volume of TCM FCRs is tedious, time-consuming, and labor intensive. Hence there is an urgent need for the development of an effective method to automatically structure the free-text clinical records.
11	Liu H et al., 2015	The symptoms and pathogenesis entity recognition of TCM medical records based on CRF	2015	CA	Clinical records	500 TCM records from "11th five-year plan" medical records database	Not specified	None	CRF	Machine learning	Supervised	Symptoms, pathogenesis	Entity extraction	Symptoms: Precision=84.02%, Recall=81.10%, F1=82.53%; pathogenesis: Precision=86.40%, Recall=84.65%, F1=85.52%	None		Propose a method to extract symptoms and pathogenesis entity recognition of TCM medical records.	Under the appropriate characteristics template CRF shows higher performance for the symptom and pathogenesis entity recognition of the TCM medical records.	How to effectively and maximize use the valuable resources for the TCM informationization.
12	Jiang Q et al., 2016	Free text mining of TCM medical records based on conditional random fields	2016	CA	Clinical records	more than 600 free text of TCM medical records	Not specified	None	CRF/ HMM / MEMM	Machine learning	Supervised	Symptoms, signs, TCM diagnosis, Chinese medicines (drug), prescriptions, TCM syndrome type, etc.	Entity extraction	CRF: Precision=90.57%, Recall=85.85%, F-score=88.15%; HMM=86.29%, Recall=79.92%, F-score=82.98%	Ö	Comparisons among CRF, HMM and MEMM	Aim to give an extracted method with text mining based on conditional random fields.	CRF is more appropriate and precise than HMM, ME and MEMM on clinical terms recognitions in TCM medical records.	How to extract medical terms from TCM medical records based on conditional random fields.
13	Jiang Q et al., 2016	Multi-combined features text mining of TCM medical cases with CRF	2016	CA	Clinical records	about 600 TCM medical cases obtained from Traditional Chinese Medical Hospital of Guangdong Province	Not specified	None	CRF	Machine learning	Supervised	Symptoms or signs, TCM diagnosis, TCM syndrome type, Chinese medicines (drug), and names of TCM prescriptions	Entity extraction	With all features: P=89.74%, R=82.9.%, F=86.18%	Ö	Compared with different combined labeling features	In order to improve accuracies of recognitions, CRF model is used for terms recognitions in TCM medical cases with multi- labeling features.	The results show that, “grammatical property of words” is the best labeling features in all individual labeling features. Multi-combined features have higher scores than individual labeling features on improving clinical terms recognition. The combined mode of grammatical property of words”, “words in sentence”, and “words in clinical dictionary” may be the most suitable labeling features. Multi-…	How to extract the data and terms automatic and intelligently, and classify into form a database.
14	Wang J et al., 2016	Relation extraction from Traditional Chinese Medicine journal publication	2016	CA	Journal publications	31 pieces of TCM journal publication	Not specified	None	Decision Tree / rules	Machine learning; rule-based method	Supervised	Effect relation, conditional effect relation	Relation extraction	Rule-based approach: F-score=46%; feature-based approach: F-score=41%	Ö	Comparison between the rule-based approach and The feature-based approach	Extract relation from traditional Chinese medicine journal publication.	The rule-based approach excels the feature-based approach which may be due to the small size of the dataset at hand. This research introduces and compares two extraction approaches, in which also address some of the more Chinese-specific NLP problems, such as word segmentation andflexible syntactic structure.	How to extract relation from TCM text which is made more difficult by the Chinese language. The Chinese language differs significantly from English, both in lexical representation and grammatical structure. These differences lead to problems in Chinese NLP, such as word segmentation and flexible syntactic structure.
15	Wan H et al, 2016	Extracting relations from traditional Chinese medicine literature via heterogeneous entity networks	2016	JA	Journal publications	106150 abstracts in published articles on TCM from a Chinese publication database	Not specified	None	Heterogeneous factor graph model (HFGM)	Machine learning	Semi-supervised	Herb-syndrome relations, herb-disease relations, formula-syndrome relations, formula-disease relations, syndrome-disease relations.	Relation extraction	Precision=90.39%, Recall=86.98%, F1=88.56%	Ö	Compared with a traditional SVM classifier	Collectively and globally extract multiple types of relations from the entire corpus of TCM literature.	Heterogeneous factor graph model (HFGM) based on heterogeneous entity networks significantly improved the ability to extract relations from TCM literature.	The main challenge of relation extraction from TCM data is the complexity of the TCM systemitself. Multiple types of interwoven relations can exist between tens of thousands of heterogeneous TCM entities.
16	Liang J et al, 2017	A Novel Approach towards Medical Entity Recognition in Chinese Clinical Text	2017	JA	Clinical records	972 admission notes from Second Affiliated Hospital Zhejiang University School of Medicine	Not specified	None	CRF	Machine learning	Supervised	TCM drug name	Entity extraction	Recognition of traditional Chinese medicine drug names: precision=94.2%, recall=92.8%, F-measure=93.5%	Ö	Compared with the baseline system which used the maximum matching algorithm and professional drug dictionaries (dictionary-based methods)	Proposed a new cascade-type approach towards medical entity recognition in Chinese.	The proposed approach avoids the side effects due to abundant negative samples and improves the recognition performance of drug named enti ties in the logographic (Chinese) descriptions.	Much less work has been done on nonstructural texts that are written in Chinese, or in the setting of differentiation of Chinese drug names between traditional Chinese medicine and Western medicine.
17	Ruan T et al, 2017	An automatic approach for constructing a knowledge base of symptoms in Chinese	2017	JA	Clinical records	1000 EMRs from Shanghai Shuguang Hospital	Not specified	None	CRF	Machine learning	Supervised	Symptoms, departments, diseases, medicines, and examinations	Entity extraction	Precision of TCM symptom is 93.26%	None		Construct knowlegde database to help therapists with symptom recommendations.	Construct a knowledge database to be used to annotate symptoms in EMRs and can also be embedded into EMR systems to help therapists with symptom recommendations.	While a large number of well-known knowledge bases (KBs) in life science have been published as Linked Open Data, there are few KBs in Chinese.
18	Sun X et al.,2017	Research on entity relation extraction in TCM acupuncture and moxibustion field	2017	JA	Journal publications	350 abstracts from literature information of "Acupuncture Clinical Journal" published between 2009 and 2013	Not specified	None	SVM	Machine learning	Supervised	Disease-treatment relation, health-care relation, meridian points-treatment and health-care method relation, medication-treatment and health-care method relation	Relation extraction	The F-measure of entity relation classication model of DM, HM, AM and DRM reached 93.25%, 87.19%, 86.57% and 84.57% respectively	None	Discusses the effective feature set of entity relationship classification, the contributions of verb feature, all word features of entities, word distance feature and clause feature are different for different types of entity relation classification.	Aim to research on entity relation extraction in TCM acupuncture and mox ibustion field.	The support vector machine statistical machine learning method is used to train the classification model of entity relationship in acupuncture and moxibustion field. The experimental results show that the suggested method has a good effect on the extraction of entity relations in TCM acupuncture and moxibustion field.	How to extract semantic relations among the entities from the massive text collection, and the transformation of original text information into struc tured information suitable for the database access.
19	Zhang H et al., 2018	TCMEF: A TCM Entity Filter Using Less Text	2018	CA	Web data	7500 TCM related entity titles from Baidu Baike and Hudong Baike	Not specified	TCM entity filter (TCMEF)	Short Text LSTM Classifier (STLC)	Deep learning	Supervised	Person name	Entity extraction	F1 score of TCMEF=92.75%	Ö	Compared with general word based short text classification algorithms and Latent Dirichlet Allocation based model	Propose a three-phase filtering framework for TCM entities	The three-phase fifiltering framework for TCM entities uses the stroke features of Chinese characters to recognize the TCM short text titles and make individual identifification for person names. It saves network, storage and computing costs for online entity filtering since we only have to download pages and analyze rich text for less than 10% of the entities.	The entities in text style and character shape in TCM titles are often shorter than 20, many of them are even shorter than 10 characters. It’s hard for general short text classification algorithms to collect enough features for these titles.
20	Wang L et al, 2018	Toward a normalized clinical drug knowledge base in China-applying the RxNorm model to Chinese clinical drugs	2018	JA	Web data	170600 drug entries from China Food and Drug Administration, 8530 drugs from China Health Insurance Systems, 28071 entries from Hospital Pharmacy Systems, and 936 drugs from China Pharmacopoeia	Not specified	None	NLP tool based on the pattern-based parsing rules	Rule-based method		Drug name, ingredient, dose form, semantic clinical drug form, semantic clinical drug	Attribute extraction	The extraction of dose forms achieved the highest performance for Chinese patent drugs: F-measure=92.70%	None		Build a Normalized Chinese Clinical Drug (NCCD) knowledge base, by applying and extending the information model of RxNorm to Chinese clinical drugs.	NCCD can represent normalized drug information precisely with a good coverage of popular drug resources.	(1) Different drug terminologies developed in China makes it difficult to exchange drug information across different systems. (2) The lack of interoperability among different drug terminologies may cause safety issues, (3) for health Information Technology vendors, they also face the challenge of mapping among different drug terminologies when build ing clinical information systems.
21	Chi Y et al., 2018	Knowledge Management in Healthcare Sustainability: A Smart Healthy Diet Assistant in Traditional Chinese Medicine Culture	2018	JA	Web data	China Food Composition and three Chinese health websites. Training:4000; test: 1000	Not specified	None	CRF for entity extraction; SVM, naive Bayes (NB), LSTM, and KNN for relation extraction	Machine learning; deep learning	Supervised	Entities: food material, dish, nutritional element, symptom, and crowd; relations: "good for" or "bad for" relationships between “food material" and "symptom", and “same”, “related” or “different” relationships between two “food material” entities	Entity extraction; relation extraction	concept extraction and relationship recognition were all above 85%.	Ö	Compared among SVM, NB, LSTM, KNN	To help people retrieve and learn healthy diet knowledge more efficiently and comprehensively, this paper designs a knowledge graph to integrate healthy diet information on the internet and provides a semantic retrieval system.	In the knowledge graph, five main concepts are defined, including food material, dish, nutritional element, symptom, and crowd, as well as the relationships among them. By using the system, users learn healthy diet knowledge more quickly and comprehensively and they are more inclined to have balanced diets.	The data regarding healthy diets available on the internet is increasing rapidly and is distributed on multiple sources. It is time-consuming for users to learn about healthy diets on the internet: they need to search data on multiple platforms, choose and integrate information, and then understand what they have learned.
22	Chen T et al, 2019	A general approach for improving deep learning-based medical relation extraction using a pre-trained model and fine-tuning	2019	JA	Journal publications	106150 abstracts from papers published in 114 most popular Chinese TCM journals	Not specified	None	Combine BERT with a one-dimensional convolutional neural network (1d CNN) to fine-tune the pre-trained model	Deep learning	Supervised	Herb-syndrome relation, herb-disease relation, formula-syndrome relation, formula-disease relation, syndrome-disease relation	Relation extraction	The ‘1d-CNN fine-tuning’ approach: Precision=95.18%, Recall=90.61%, F1-measure=92.82%	Ö	Compared with SVM, iterative SVM, HFGM, 1d-CNN general embeddings, 1d-CNN TCM embeddings, BERT with pre-trained model	Propose a pre-trained model and a fine-tuning technique to improve these approaches without additional time-consuming human labeling.	The ‘1d-CNN fine-tuning’ approach achieves the best performance on four of the five relation types.	Most of the current deep learning approaches for medical relation extraction require large-scale training data to prevent overfitting of the training model.
23	Gong F et al, 2019	On building a diabetes centric knowledge base via mining the web	2019	JA	Web data	7703 instances and 96041 edges from eight prevalent vertical portals on health care in China	Diabetes	None	Instance matching algorithm	Dictionary-based method		Traditional Chinese medicine	Entity extraction	The accuracy of overall knowledge base is 98.1%	Ö	Compare with instance matching with pre-processing	Constructing a high-coverage knowledge base of a specific disease to support the above extraction tasks called KB-based Extraction	Introduced an approach to constructing diabetes knowledge base.	To support the analytical procedures, researchers and analysts expend a mass of labor cost to collect experimental data, which is also error-prone. To reduce the cost and to ensure the data quality, there is a growing trend of extracting clinical events in form of knowledge from electronic medical records (EMRs)
24	Jin Z et al., 2019	Named Entity Recognition in Traditional Chinese Medicine Clinical Cases Combining BiLSTM-CRF with Knowledge Graph	2019	CA	Text book	75 modern TCM clinical cases and 75 ancient TCM clinical cases from two authoritative clinical case books and literatures in CKCEST	Not specified	None	TCMKG-LSTM-CRF	Deep learning	Supervised	Medicine, alias, prescription, pieces, disease, symptom, syndrome, meridian, property,flavour and function	Entity extraction	F-score=85.41%	Ö	Compared with CRF, BiLSTM-CRF, BiLSTM-CRF Pretrained	These methods cannot effectively solve the problem of low recognition rate of rare words, which is common in TCM field	Propose TCMKG LSTM-CRF model that utilizes knowledge graph information to strength the learning ability and recognize rare words. This model introduces knowledge attention vector model to implement attention mechanism between hidden vector of neural networks and knowledge graph candidate vectors and consider influence from previous word. The experiment results prove the effectiveness of our model.	How to effectively solve the problem of low recognition rate of rare words, which is common in TCM field.
25	Zhou Y et al, 2019	Research on Construction and Application of TCM Knowledge Graph Based on Ancient Chinese Texts	2019	CA	Ancient literature	17081 pieces of labeled data from texts of ancient traditional Chinese medicine books	Not specified	TCM Knowledge Graph Construction and Application System	Ontoloty creating and editing tool	Not mentioned		Disease attributes includes alias, definition, English name, clinical manifestations, pathogenesis, complications, examination, treatment, etiology, related diseases, histopathology, drugs, diagnostic points, and so on.	Attribute extraction	Not mentioned	None		Builds a knowledge graph based on the texts of ancient traditional Chinese medicine books through the key concepts of diseases, symptoms, prescriptions, drugs, medical records, and related content such as regions, doctors, and dynasties in traditional Chinese medicine texts	This paper builds a knowledge graph based on the texts of ancient traditional Chinese medicine books through the key concepts of diseases, symptoms, prescriptions, drugs, medical records, and related content such as regions, doctors, and dynasties in traditional Chinese medicine texts, to form a comprehensive knowledge service system, providing multi-dimensional and personalized knowledge customi…	The “document-centered” literature retrieval and information acquisition methods can no longer meet the demand, and instead are “knowledge-centric” structured, networked and intelligent knowledge services.
26	Song B et al., 2020	Incorporating Lexicon for Named Entity Recognition of Traditional Chinese Medicine Books	2020	CA	Ancient literature	376 TCM books from the Han Dynasty to the Qing Dynasty	Not specified	None	BiLSTM-CRF	Deep learning	Supervised	Symptom	Entity extraction	Precision=76.80%, Recall=72.11%, F1=74.38%	Ö	Compared with HMM, CRF	In order to improve the performance of NER for TCM books	Propose a method which is based on biLSTM-CRF model and can incorporate lexicon information into representation layer to enrich its semantic information. Experimental results on annotated data of “Shanghan Lun” show that this method outperforms previous models for NER of TCM books.	Lexicon information and large-scale of unlabeled corpus data are not fully exploited in the previous methods.
27	Deng N et al, 2020	A Method of Collecting Four Character Medicine Effect Phrases in TCM Patents Based on Semi-supervised Learning	2020	CA	Patent texts	10000 Chinese patents from patent searching system	Not specified	None	Co-training based method	Machine learning	semi-supervised	Four character medicine effect phrases	Entity extraction	In each iteration, the extraction accuracy are all above 97%	None		Aim to extracting four word character phrases from four word character phrases.	Starting from a small number of annotated data, and taking advantage of the location characteristics of four character phrases, this paper proposes a semi-supervised learning method to collect four character effect phrases from the abstracts texts of TCM patents, which can help enrich the lexicon of Chinese word segmentation system, and also provide support for semantic patent retrieval and analy…	The effects of medicine in TCM patents are often described using four character phrases which are not easily iden tified by the Chinese word segmentation system, thus greatly affects the results of patent analysis and mining.
28	Deng N et al, 2020	Serialized Co-Training-Based Recognition of Medicine Names for Patent Mining and Retrieval	2020	JA	Patent texts	7000 patent texts including Chinese word “Qing re jie du” from the patent retrieval system	Not specified	None	Serialized co-training method with five classifiers	Machine learning	semi-supervised	Medicine names	Entity extraction	Precision is 98.6% when the number of patent texts reaches 3000	None		Propose a modified and serialized co-training method to recognize medicine names from TCM patent abstract texts.	This method can maintain high accuracy under relatively low time complexity.	Because of the lack of a comprehensive Chinese herbal medicine name thesaurus, traditional thesaurus-based Chinese word segmentation and named entity recognition are not suitable for medicine identification in TCM patents.
29	Feng L et al., 2020	Research on Named Entity Recognition of Traditional Chinese Medicine Electronic Medical Records	2020	CA	Clinical records	131 electronic medical records from the Hubei Provincial Hospital of Traditional Chinese Medicin	Not specified	None	BiLSTM-CRF, lattice LSTM-CRF, BERT	Deep learning	Supervised	Symptom	Entity extraction	The BERT model: Precision=89.94%, Recall=88.27%, F1 value=89.10%.	Ö	Compared with BiLSTM-CRF and lattice LSTM-CRF	In order to explore the effective method of named entity recognition of TCM EMR.	This paper selects three models, BiLSTM-CRF, lattice LSTM-CRF and BERT, to recognize the symptom entities in EMR, and carries out comparative experiments. The experimental results show that BERT model has the best recognition effect about TCM EMR, the precision is 89.94%, the recall is 88.27%, and the F1 value is 89.10%.	(1) The naming entity of traditional Chinese medicine has complex characteristics and uncertain length. In addition, there are sub entities in the entity. Therefore, the work of named entity recognition in traditional Chinese medicine is more complex and more difficult than that in general fields. (2) Character-based model can avoid word segmentation errors, but it can also lose the semantic info…
30	Xie J et al., 2020	Research on Structured Information Extraction Method of Electronic Medical Records of Traditional Chinese Medicine	2020	CA	Clinical records	1000 inpatient electronic medical records	Not specified	None	Combined with Levenshtein string similarity algorithm and entity matching technology	Dictionary-based method		Diagnosis and treatment	Entity extraction	Not mentioned	None		To study the extraction method of Structured information, and realize the structuration and standardization of inpatient electronic medical records of TCM.	KS-CCD method is suitable for the extraction of structured information of electronic medical records of TCM.	(1) Due to the flexibility of Chinese natural language expression and the individual characteristics of TCM clinical information content, it is a difficult problem to study the extraction of TCM clinical text medical record information. (2) Most of the medical information obtained from the electronic medical records system of TCM by researchers is semi-structured and unstructured data, which can …
31	Liu L et al, 2020	A semi-supervised approach for extracting TCM clinical terms based on feature words	2020	JA	Text book	Formulas of Chinese Medicine (28600 words)	Not specified	None	BiLSTM-CRF	Deep learning	Semi-supervised	Traditional Chinese medicine, symptoms, patterns, diseases and formulas	Entity extraction	F1-value=78.70%, Precision=77.56%, Recall=79.87%	Ö	Compared with the supervised method	Proposes a semi-supervised approach for extracting TCM clinical terms based on character vector.	The method reduces the cost of manual labeling and improves the experiment results based on the help of the feature word.	(1) Ancient Chinese language is extensively used in the TCM corpus which brings difficulties to TCM NER research. (2) manual labeling of supervised methods are costly and labor-intensive.
32	Zhang M et al., 2020	Traditional Chinese Medicine knowledge Service based on Semi-Supervised BERT-BiLSTM-CRF Model	2020	CA	Ancient literature	Ancient Chinese medicine books	Not specified	None	BERT-BiLSTM-CRF	Deep learning	Semi-supervised	Symptoms, syndromes, treatment, Chinese medicine, prescriptions, pulse, tongue, efficacy	Entity extraction	Accuracy=81.24%, Recall=80.84%, F1 value=81.04%.	Ö	Compared with CRF, BiLSTM-CRF	This paper proposes a semi-supervised method to extract entities from TCM texts.	Experiments show that TCM entity recognition accuracy of this embedded Semi-BERT-BiLSTM-CRF model reaches 81.24%, which effectively improves the TCM entity recognition accuracy and reduces the manual labeling work. The results of this research can be applied to scenarios such as auxiliary diagnosis of TCM and expert system after subsequent improvement and transformation.	The existing methods are not accurate enough to solve TCM named entity recognition and require a lot of manual labeling data.
33	Deng N et al, 2020	A Method of Annotating Disease Names in TCM Patents Based on Co-training	2020	CA	Patent texts	1000 abstract texts of TCM patents	Not specified	None	Serialized co-training method	Machine learning	semi-supervised	Disease name	Entity extraction	Not mentioned	None		This paper proposes a semi-supervised method to extract entities from TCM texts.	Utilizing the characteristics of TCM patent texts and based on co-training method in machine learning, this paper proposes a method of annotating disease names from TCM patent texts. Experiments show that this method is feasible and effective. This method can also be extended to annotate other semantic information in TCM patents.	How to extract information without annotating a large number of text data manually.
34	Qu Q et al., 2020	Named Entity Recognition of TCM Text Based on Bert Model	2020	CA	Ancient literature	A total of 32614 characters from "Treatise on Febrile Diseases"	Not specified	None	BERT-BiLSTM-CRF	Deep learning	Supervised	Symptoms, disease names, time, prescription names, and drug names	Entity extraction	The best recognition effect on drugs, with an F-value as high as 88.79%	Ö	Compared with BiLSTM-CRF, LSTM-CRF	Aiming at the problem of fuzzy entity recognition and less labeled data in the field of traditional Chinese medicine, a named entity recognition model based on Bert-BiLSTM-CRF is constructed and tested on the corresponding data set.	By constructing the word vector through the Bert model and then using it in BiLSTM-CRF, both the accuracy rate, the recall rate, or the F value are improved.	The problem of fuzzy entity recognition and less labeled data in the field of TCM.
35	Ruan C et al, 2020	Relation Extraction for Chinese Clinical Records Using Multi-View Graph Learning	2020	JA	Clinical records	More than 100,000 paper abstracts from a Chinese publication database	Not specified	None	Multi-view graph model to extract relation (MVG2RE)	Deep learning	Supervised	Herb-syndrome, herb-disease, formula-disease, formula-syndrome, and syndrome-disease	Relation extraction	Precision=86.38%, recall=81.42%, F1-score= 84.07%	Ö	Compared with SVM-C, PTM, ADRN, SHR, RelExtr	Extract relation from Chinese clinical records.	Propose a multi-view graph representation learning that adopts heterogeneous GCN and attention mechanism for complex relation extraction among multi-type entities	Very limited relation extraction research has been conducted on clinical notes written in Chinese, especially TCM clinical records.
36	Shu Z et al, 2020	Clinical features and the traditional Chinese medicine therapeutic characteristics of 293 COVID-19 inpatient cases	2020	JA	Clinical records	293 COVID-19 inpatient cases from TCM hospital in Wuhan	Coronavirus disease 2019	Information-extraction–annotation system	Collaboration of dictionary based annotation with manual verification strategies	Dictionary-based method		Symptoms, mentions of drugs and therapies, and chronic diseases that were recorded in the medical histories of patients	Entity extraction	Not mentioned	None		Help to detect the longitudinal patterns of TCM symptoms and treatments for COVID-19.	This paper extracted various expressions of phenotype terms in clinical text by using a framework of human–machine collaboration strategies. This framework was helpful to fully extract the various expressions of phenotype terms in the clinical text and assure the data quality of the final extracted named entities.	How to extract the information of clinical manifestations and any prior treatments before admissions from electronic medical records effectively.
37	Yang C et al., 2020	A temporal semantic search system for traditional Chinese medicine based on temporal knowledge graphs	2020	CA	Clinical records	Classic Chinese Medicine Clinical Case Library	Not specified	None	Regular expression	Rule-based method		Temporal facts	Terms extraction	Average Precision=0.825	Ö	Compared with tf-idf, tf-idf+entity linking	Implement a temporal semantic search system.	Propose a new model tailored for TCM based on the temporal knowledge graph in this paper.	Current TCM-based retrieval systems cannot effectively deal with the temporal intentions of search sentences, which leads to bad experiences for users in retrieval services. Most of temporal information are ignored in the knowledge map construction.
38	Zhai X et al, 2020	Treating Different Diseases With the Same Method—A Traditional Chinese Medicine Concept Analyzed for Its Biological Basis	2020	JA	Journal publications	148000 articles in PubMed related to Traditional Chinese medicine dated from 2010 to 2020	Neuroendocrine-immune (NEI)	None	Dictionary matching method for entity extraction; sparse multi-instance learning algorithm(SMIL) to extract gene relationships	Dictionary-based method；Machine learning		Gene entity, Gene-syndrome relationship	Entity extraction; relation extraction	Not mentioned	None		Aim to use big data technology and complex network theory to mine the genes specifically relevant to these TCM syndromes.	This paper provides a new approach to use big data and complex network as a method to analysis the biological basis of the TCM concept“treating different diseases with the same method”.	Whether the TCM concept “treating different diseases with the same method” have the molecular mechanism.
39	Zhang D et al, 2020	Improving Distantly-Supervised Named Entity Recognition for Traditional Chinese Medicine Text via a Novel Back-Labeling Approach	2020	JA	Ancient literature	Chinese medical records of all famous doctors(100000 words)	Not specified	None	BiLSTM	Deep learning	Distantly supervised	Chinese medicine, symptom, medicine presciption, dose, tongue-like, pulse	Entity extraction	Precision=73.06%, Recall=66.75%, F1-measure=69.76%	Ö	Compared with Distant-LSTM-CRF and dictionary matching method	Propose a method for entity recognition based on distant supervision, and complete the entity recognition task under the premise of only using the entity vocabulary related to the TCM field.	The scheme can effectively improve the entity recognition on the basis of distant supervision.	The limitation of using machine learning methods, which in need of a large amount of manually labeled data.
40	Zhang H et al, 2020	Artificial Intelligence-Based Traditional Chinese Medicine Assistive Diagnostic System: Validation Study	2020	JA	Clinical records	22984 electronic health records from Guanganmen Hospital of the China Academy of Chinese Medical Sciences	Not specified	Artificial intelligence–based assistive diagnostic systems	BiLSTM-CRF	Deep learning	Supervised	Chief complaints(symptom name, symptom duration, accompanying symptom, etc.); pathological history(symptom name, symptom cause, etc.); personal history(place of birth, smoking history, drinking history, etc.); TCM diagnosis(tongue quality, furred tongue, tongue body, pulse, etc.)	Entity extraction	Not mentioned	None		Develop an artificial intelligence–based assistive diagnostic system capable of simultaneously diagnosing the disease and producing a list of corresponding syndromes.	The proposed system had a good diagnostic accuracy and a strong capability for generalization. The disease-type prediction accuracies of the top one, top three, and top five were 80.5%, 91.6%, and 94.2%, respectively.	The relationship between diseases and syndromes is not one-to-one but rather many-to-many makes it very challenging for a machine to perform syndrome predictions.
41	Zhao K et al, 2020	Text mining and analysis of treatise on febrile diseases based on natural language processing	2020	JA	Ancient literature	Zhao Kaimei’s version of “Treatise on Febrile Diseases (TFDs)” in Song Dynasty	Not specified	None	Jieba Chinese processing toolkit with TextRank algorithm		/	Names of people, places, terminology	Entity extraction	Accuracy is about 86%	None		With using natural language processing (NLP) technology to analyze and process the text of “Treatise on Febrile Diseases(TFDs)” for the sake of finding important information, this paper attempts to apply NLP in the field of text mining of TCM literature	The results were promising and provided a new method to interpret TCM literature, verify and mine clinical information from medical text.	How to use modern computer technology to quickly and easily discover new therapies and knowledge from the vast number of the TCM literature
42	Zheng Z et al., 2020	TCMKG: A deep learning based traditional chinese medicine knowledge graph platform	2020	CA	Clinical records	500 records from Chinese medicine books	Not specified	TCMKG	BiLSTM-CRF	Deep learning	Supervised	Syndrome, disease, symptom, prescription, therapy, herb	Entity extraction	F1-score is above 97%	None		This study aim to extract TCM core concepts and build ontology layer by analyzing the process of TCM diagnosis and treatment, then use deep learning to extract entities and their relations for building TCM knowledge graph from unstructured data.	This platform not only provides knowledge retrieval, but also provides a knowledge path display of the complete system structure of TCM diagnosis and treatment, which is of great help to user learning.	With the accumulation of literatures and electronic medical records, a large amount of knowledge is stored in unstructured texts which urgently needs to be extracted for learning.
43	Zhou S et al., 2021	Feature engineering vs. deep learning for paper section identification: Toward applications in Chinese medical literature	2021	JA	Journal publications	371 papers with 15057 sentences from human-curated asthma literature datasetd from CNKI	Asthma	None	Structural Bidirectional Long Short Term Memory (SLSTM) model	Deep learning	Supervised	Subjects, methods, results	Section extraction	SLSTM model achieve close to 90% performance in precision, recall, and F1-measures	Ö	Compared with CRF, BLSTM, HAN, CLSTM	Studied the paper section identification problem in the context of Chinese medical literature analysis, where the subjects, methods, and results are more valuable from a physician's perspective.	Design a novel deep learning model, the Structural BiLSTM model, which outperforms the traditional machine learning methods and other deep learning methods.	Due to natural language differences, the extracted features from English texts cannot be directly applied onto Chinese medical literature. Moreover, Chinese medical literature is often less structured than English literature, which makes the problem more difficult to tackle.
44	Bai T et al., 2021	Traditional Chinese medicine entity relation extraction based on CNN with segment attention	2021	JA	Web data	Annotated dataset with 4732 samples of herbs-diseases and 4666 samples of herbs chemicals constructed by PubMed	Not specified	None	SEGATT-CNN combined with different classifiers	Deep learning	Supervised	Entity: disease entity, herb names; Relation: herbal-disease relation, herbal-chemical relation,	Entity extraction, relation extraction	Herbal-disease relation: SVM combined SEGATT-CNN: P=0.9543, R=0.9292, F=0.9415, AUC=0.9513, Accurency=0.9569	Ö	Compared with SVM, KNN, DT, RF	In order to extract Chinese medicine-specific entity relations more reliably and efficiently from PubMed literature.	Propose a novel architecture with an improved layer for entity relation extraction. The method has an absolute advantage and is proved to be effective in solving this problem of herbal related relation extraction.	(1) Although the deep learning technology has been applied to the relation extraction task with superiorresults, relevant works are seldom adapted to TCM area. (2) language gap exists between TCM prac tices and researches, (3) classical machine learning algorithms improve the accuracy of relation extraction primarily through complicated manual feature engineering, which constrains the potential o…
45	Na D et al., 2021	Named Entity Recognition of Traditional Chinese Medicine Patents Based on BiLSTM-CRF	2021	JA	Patent texts	a total of 2000 TCM patents’ abstract texts from intellectual property websites	Not specified	None	BiLSTM-CRF	Deep learning	Supervised	Herb name, disease name, symptom, therapeutic effect, nonentity	Entity extraction	precision rate is 94.63%, recall rate is 94.47%, and F1 value is 94.48%	Ö	Compared with HMM,LSTM, BiLSTM	This study aim to design a model to fill the technical gap in NER of TCM patents.	A method combining Bidirectional Long Short-Term Memory neural network with Conditional Random Field (BiLSTM-CRF) is proposed to automatically recognize entities of interest (i.e., herb names, disease names, symptoms, and therapeutic effects) from the abstract texts of TCM patents.By virtue of the capabilities of deep learning methods, the semantic information in the context can be learned withou…	(1) Due to the long history and wide geographical distri bution of herbs. (2) Due to different writing habits, TCM doctors and researchers tend to express a certain disease name in languages similar with classical Chinese. (3) Due to the lack of labeled training sets of TCM patent texts, a proper training set has to be established man ually while applying machine learning method for NER.
46	Jia Q et al., 2021	Extraction of Traditional Chinese Medicine Entity: Design of a Novel Span-Level Named Entity Recognition Method With Distant Supervision	2021	JA	Clinical records	Case book of TCM compiled by the expert team of Professor Lu Zhaolin	Not specified	None	Span-level distantly supervised named entity recognition (NER) approach	Deep learning	distantly supervised	Symptom, medicine, prescriptions, dose, tongue-like, pulse	Entity extraction	Precision=78.28, Recall=76.52, F1-score=77.34	Ö	Compared with distant-LSTM-CRF, Novel label-back AutoNER, AdaPU, BERT-CRF.	The idea is to utilize distantly supervised method to conducted the name entity recognition (NER) task.	Propose a span-level distantly supervised named entity recognition (NER) approach to extract TCM medical entity. It utilizes the pre-trained language model, a simple multi-layer neural network as classifier to detect and classify entity. We also design a negative sampling strategy for the span-level model. The strategy randomly selects negative samples in every epoch and filter the possible false…	(1) Most of TCM clinical records are unstructured text; (2) The narrative is free-style and difficult to understand for modern medical practitioners. The cost of manually structuring and maintaining free-text clinical records is very expensive; (3) lack of gold standard datasets for supervised learning methods.
47	Zhang T et al., 2021	Chinese medical relation extraction based on multi‑hop self‑attention mechanism	2021	JA	Journal publications	4000 Chinese medical literature abstracts	Not specified	None	Multi‑hop self‑attention mechanism+BiLSTM	Deep learning	Supervised	Therapeutic relation, causal relation	Relation extraction	Therapeutic relation: Precision=88.65, Recall=98.23, F1-score=93.19; Causal relation:Precision=69.23, Recall=78.26, F1-score=73.47	Ö	Compared with CNN, Bi-LSTM, Bi-LSTM+self-attention, Bi-LSTM +multi-head attention	Propose an attention-based model to extract the multi-aspect semantic information for the Chinese medical relation extraction by multi-hop attention mechanism.	The model could generate multiple weight vectors for the sentence through each attention step, therefore, we can generate the diferent semantic representation of a sentence, respectively. Experimental results on two Chinese medical datasets show that our model is highly effective among existing experiments, achieving state-of the-art results with little feature engineering.	(1) Complex semantic information in the sentence determines the relation between entities, the semantic information cannot be represented by one sentence vector; (2) machine learning methods rely on manual con struction of features, which is laborious and time-consuming.
48	Xu H et al., 2021	A Nested Named Entity Recognition Method for Traditional Chinese Medicine Records	2021	CA	Clinical records	4096 sentences from《中华历代名医医案全库》(Chinese medical records of all famous doctors)	Not specified	None	Nested NER model based on LSTM-CRF	Deep learning	Supervised	Medicine, symptom, pulse, tongue, medicine prescription, dose, disease location, onset time and duration, severity, color, quantity, frequency	Entity extraction	Precision=85.64, Recall=86.18, F1-score=85.91	Ö	Compared with LSTM-CRF, Mention hypergraph, Span-based model.	Propose a nested named entity recognition method for traditional Chinese medicine records.	This paper use word-character-level embedding to enable the model to better learn semantic and syntactic information, two-layer labeling strategy allows the model to better extract fine-grained results. This work provides a good nested NER method for TCM records, which can extract valuable knowledge from previous TCM books and records.	Entity boundary problems caused by the difference between words and characters in TCM corpus, many methods that have great performance on the English datasets are not suitable for the NER task in TCM field
49	Guan Y et al., 2021	A Traditional Chinese Medicine Terminology Recognition Model Based on Deep Learning: A TCM Terminology Recognition Model	2021	CA	Ancient literature	TCM prescription in 517 ancient TCM books	Not specified	None	BERT-BiLSTM-CRF	Deep learning	Supervised	Disease, pattern, symptom	Entity extraction	Precision=86.54, Recall=88.59, F1-score=87.55, when the size of training set is 10000	Ö	Compared with BiLSTM(word2vec), BiLSTM-CRF(word2vec), BERT-BiLSTM	Presented a traditional Chinese medicine terminology recognition model named BERT-BiLSTM-CRF	Transferring a BERT model trained on other large-scale Chinese corpora as the pre-training model benefits the TCM terminology recognition, and CRF plays an important role in modeling the contextual label features of sequences in TCM term recognition tasks.	(1) there are some characteristics in Chinese text, such as fuzzy word boundary and lack of explicit morphological features of entities, which restrict the performance of NER model for Chinese text; (2) how to apply the most advanced deep learning model to the task of TCM term recognition.
51	Xie J et al., 2020	Research on Structured Information Extraction Method of Electronic Medical Records of Traditional Chinese Medicine	2020	CA	Clinical records	WS 445-2014 Electronic Medical Records Basic Data Set	Not specified	None	String similarity algorithm and entity matching technology	Dictionary-based method		Diagnosis and treatment information
52	Xie et al	Literature based discovery of alternative TCM medicine for adverse reactions to depression drugs	2020	JA	Publication	169,766 records from pubmed	Depression	PKDE4J		Dictionary-based method; Rule-based method		Entities: herb, disease Relations: herb-disease relation	Entity extraction; relation extraction				use the scientific literature to identify western drugs with obvious side effects. Then, we find TCM alternatives for these western drugs to ameliorate their side effects	The top-ranked herbs were highly related to the target indication, depression, and could mitigate the side-effects of the target drug, which could help in the development of new drugs.
